# Supplementary material for: Prevalence of Type 2 Diabetes in South Africa: A Systematic Review and Meta-Analysis
Source: MDPI journal article supplement (doi:10.3390/ijerph18115868), 2021-05-30
Supplement: s1 [file s1]

# Prevalence of type 2 diabetes in South Africa: a systematic review

Carmen Pheiffer<sup>1,2\*</sup>, Victoria Pillay-van Wyk<sup>3</sup>, Eunice Turawa<sup>3</sup>, Naomi Levitt<sup>4</sup>, Andre Kengne<sup>5</sup>, Debbie Bradshaw<sup>3,6</sup>

<sup>1</sup> Biomedical Research and Innovation Platform, South African Medical Research Council, Tygerberg, South Africa

<sup>2</sup> Division of Medical Physiology, University of Stellenbosch, Tygerberg, South Africa

<sup>3</sup> Burden of Disease Research Unit, South African Medical Research Council, Tygerberg, South Africa

<sup>4</sup> Division of Endocrinology and Metabolism, University of Cape Town, Observatory, South Africa.

<sup>5</sup> Non-Communicable Diseases Research Unit, South African Medical Research Council, Tygerberg, Western Cape, South Africa

<sup>6</sup> School of Public Health and Family Medicine, University of Cape Town, Observatory, South Africa

\*Corresponding author:

Carmen Pheiffer

Biomedical Research and Innovation Platform, South African Medical Research Council

Francie van Zijl Drive, P.O. Box 19070, Tygerberg 7505, South Africa

Tel: +27 21 938 0292

E-mail: [carmen.pheiffer@mrc.ac.za](mailto:carmen.pheiffer@mrc.ac.za)

**Table S1: PRISMA 2009 Checklist**

| Section/topic             | # | Checklist item                                                                                                                                                                                                                                                                                              | Reported on page # |
|---------------------------|---|-------------------------------------------------------------------------------------------------------------------------------------------------------------------------------------------------------------------------------------------------------------------------------------------------------------|--------------------|
| <b>TITLE</b>              |   |                                                                                                                                                                                                                                                                                                             |                    |
| Title                     | 1 | Identify the report as a systematic review, meta-analysis, or both.                                                                                                                                                                                                                                         | 1                  |
| <b>ABSTRACT</b>           |   |                                                                                                                                                                                                                                                                                                             |                    |
| Structured summary        | 2 | Provide a structured summary including, as applicable: background; objectives; data sources; study eligibility criteria, participants, and interventions; study appraisal and synthesis methods; results; limitations; conclusions and implications of key findings; systematic review registration number. | 2                  |
| <b>INTRODUCTION</b>       |   |                                                                                                                                                                                                                                                                                                             |                    |
| Rationale                 | 3 | Describe the rationale for the review in the context of what is already known.                                                                                                                                                                                                                              | 4-5                |
| Objectives                | 4 | Provide an explicit statement of questions being addressed with reference to participants, interventions, comparisons, outcomes, and study design (PICOS).                                                                                                                                                  | 5                  |
| <b>METHODS</b>            |   |                                                                                                                                                                                                                                                                                                             |                    |
| Protocol and registration | 5 | Indicate if a review protocol exists, if and where it can be accessed (e.g., Web address), and, if available, provide registration information including registration number.                                                                                                                               | 6                  |
| Eligibility criteria      | 6 | Specify study characteristics (e.g., PICOS, length of follow-up) and report characteristics (e.g., years considered, language, publication status) used as criteria for eligibility, giving rationale.                                                                                                      | 6-7                |

|                                           |           |                                                                                                                                                                                                                               |                                 |
|-------------------------------------------|-----------|-------------------------------------------------------------------------------------------------------------------------------------------------------------------------------------------------------------------------------|---------------------------------|
| <b>Information sources</b>                | <b>7</b>  | <b>Describe all information sources (e.g., databases with dates of coverage, contact with study authors to identify additional studies) in the search and date last searched.</b>                                             | <b>6</b>                        |
| <b>Search</b>                             | <b>8</b>  | <b>Present full electronic search strategy for at least one database, including any limits used, such that it could be repeated.</b>                                                                                          | <b>6, Supplementary Table 1</b> |
| <b>Study selection</b>                    | <b>9</b>  | <b>State the process for selecting studies (i.e., screening, eligibility, included in systematic review, and, if applicable, included in the meta-analysis).</b>                                                              | <b>7-8</b>                      |
| <b>Data collection process</b>            | <b>10</b> | <b>Describe method of data extraction from reports (e.g., piloted forms, independently, in duplicate) and any processes for obtaining and confirming data from investigators.</b>                                             | <b>8</b>                        |
| <b>Data items</b>                         | <b>11</b> | <b>List and define all variables for which data were sought (e.g., PICOS, funding sources) and any assumptions and simplifications made.</b>                                                                                  | <b>8</b>                        |
| <b>Risk of bias in individual studies</b> | <b>12</b> | <b>Describe methods used for assessing risk of bias of individual studies (including specification of whether this was done at the study or outcome level), and how this information is to be used in any data synthesis.</b> | <b>7-8</b>                      |
| <b>Summary measures</b>                   | <b>13</b> | <b>State the principal summary measures (e.g., risk ratio, difference in means).</b>                                                                                                                                          | <b>7</b>                        |
| <b>Synthesis of results</b>               | <b>14</b> | <b>Describe the methods of handling data and combining results of studies, if done, including measures of consistency (e.g., <math>I^2</math>) for each meta-analysis.</b>                                                    | <b>8-9</b>                      |
| <b>Risk of bias across studies</b>        | <b>15</b> | <b>Specify any assessment of risk of bias that may affect the cumulative evidence (e.g., publication bias, selective reporting within studies).</b>                                                                           | <b>9</b>                        |
| <b>Additional analyses</b>                | <b>16</b> | <b>Describe methods of additional analyses (e.g., sensitivity or subgroup analyses, meta-regression), if done, indicating which were pre-specified.</b>                                                                       | <b>9</b>                        |

| <b>RESULTS</b>                       |           |                                                                                                                                                                                                                 |                                  |
|--------------------------------------|-----------|-----------------------------------------------------------------------------------------------------------------------------------------------------------------------------------------------------------------|----------------------------------|
| <b>Study selection</b>               | <b>17</b> | <b>Give numbers of studies screened, assessed for eligibility, and included in the review, with reasons for exclusions at each stage, ideally with a flow diagram.</b>                                          | <b>10, Figure 1</b>              |
| <b>Study characteristics</b>         | <b>18</b> | <b>For each study, present characteristics for which data were extracted (e.g., study size, PICOS, follow-up period) and provide the citations.</b>                                                             | <b>10</b>                        |
| <b>Risk of bias within studies</b>   | <b>19</b> | <b>Present data on risk of bias of each study and, if available, any outcome level assessment (see item 12).</b>                                                                                                | <b>10, Supplementary Table 3</b> |
| <b>Results of individual studies</b> | <b>20</b> | <b>For all outcomes considered (benefits or harms), present, for each study: (a) simple summary data for each intervention group (b) effect estimates and confidence intervals, ideally with a forest plot.</b> | <b>11, Figures 2,3</b>           |
| <b>Synthesis of results</b>          | <b>21</b> | <b>Present results of each meta-analysis done, including confidence intervals and measures of consistency.</b>                                                                                                  | <b>24, Table 1</b>               |
| <b>Risk of bias across studies</b>   | <b>22</b> | <b>Present results of any assessment of risk of bias across studies (see Item 15).</b>                                                                                                                          | <b>13, Supplementary Table 5</b> |
| <b>Additional analysis</b>           | <b>23</b> | <b>Give results of additional analyses, if done (e.g., sensitivity or subgroup analyses, meta-regression [see Item 16]).</b>                                                                                    | <b>11</b>                        |
| <b>DISCUSSION</b>                    |           |                                                                                                                                                                                                                 |                                  |
| <b>Summary of evidence</b>           | <b>24</b> | <b>Summarize the main findings including the strength of evidence for each main outcome; consider their relevance to key groups (e.g., healthcare providers, users, and policy makers).</b>                     | <b>14</b>                        |

|                    |           |                                                                                                                                                                      |              |
|--------------------|-----------|----------------------------------------------------------------------------------------------------------------------------------------------------------------------|--------------|
| <b>Limitations</b> | <b>25</b> | <b>Discuss limitations at study and outcome level (e.g., risk of bias), and at review-level (e.g., incomplete retrieval of identified research, reporting bias).</b> | <b>3, 17</b> |
| <b>Conclusions</b> | <b>26</b> | <b>Provide a general interpretation of the results in the context of other evidence, and implications for future research.</b>                                       | <b>3, 17</b> |
| <b>FUNDING</b>     |           |                                                                                                                                                                      |              |
| <b>Funding</b>     | <b>27</b> | <b>Describe sources of funding for the systematic review and other support (e.g., supply of data); role of funders for the systematic review.</b>                    | <b>18</b>    |

***From:* Moher D, Liberati A, Tetzlaff J, Altman DG, The PRISMA Group (2009). Preferred Reporting Items for Systematic Reviews and Meta-Analyses: The PRISMA Statement. PLoS Med 6(6): e1000097. doi:10.1371/journal.pmed1000097**

**Table S2.** PubMed search strategy

| Search | Query                                                                                                                                                                                                                                                                                                                                                                                           |
|--------|-------------------------------------------------------------------------------------------------------------------------------------------------------------------------------------------------------------------------------------------------------------------------------------------------------------------------------------------------------------------------------------------------|
| #4     | Search ((#3 NOT (animals[mh] NOT humans[mh]))) AND ("1997/01/01"[Date-Publication] : "2020/06/30"[Date-Publication])                                                                                                                                                                                                                                                                            |
| #3     | Search (#1 AND #2)                                                                                                                                                                                                                                                                                                                                                                              |
| #2     | Search (South Africa[mh]OR"South Africa*" [tiab] OR RSA [tiab] OR Africa, Southern[mh:noexp] OR Southern Africa [tiab])                                                                                                                                                                                                                                                                         |
| #1     | Search (Diabetes [Mesh] OR Diabetes mellitus [Mesh] OR type 2 diabetes mellitus [Mesh] OR type 2 diabetes [Mesh] OR Diabetes mellitus, type 2 [Mesh] OR Diabetes, type 2 [Mesh] OR hyperglycemia [Mesh] OR blood glucose [Mesh] OR Hemoglobin A, glycosylated [Mesh] OR Glycosylated hemoglobin OR diagnosis OR impaired glucose tolerance OR impaired fasting glucose OR undiagnosed diabetes) |

The PubMed search strategy was adapted for optimal searching in the other databases.

**Table S3. Quality assessment criteria for prevalence studies**

| Domain            | Criteria                                                                | Question                                                                                                                                                   | Score |
|-------------------|-------------------------------------------------------------------------|------------------------------------------------------------------------------------------------------------------------------------------------------------|-------|
| External validity | Representativeness                                                      | Was a sample size calculation conducted and is it adequate?                                                                                                | 1     |
|                   |                                                                         | Is the target population a close representation of the national population in relation to relevant variables?                                              | 1     |
|                   |                                                                         | Was the sampling frame a true or close representation of the population?                                                                                   | 1     |
|                   |                                                                         | Was a form of random selection used to select the sample?<br>Was the sampling method appropriate for the research question?                                | 2     |
|                   | Non-response bias                                                       | Were there similarities between participants and non-participants in relation to demographic characteristics?                                              | 1     |
|                   |                                                                         | Was the overall/response rate of the study reported?                                                                                                       | 1     |
|                   |                                                                         | What was the overall/response rate for the study?                                                                                                          | 1     |
|                   |                                                                         | Was the overall/response rate adequate for the study?<br>Excellent $\geq 80\%$ , Average 60-79%, Poor $< 60\%$                                             | 1     |
| Internal validity | Case definition                                                         | Were the cases classified using the ICD codes or was an acceptable case definition used? What is the case definition?                                      | 1     |
|                   |                                                                         | Were the study instruments used to measure the parameter of interest shown to have reliability and validity in this study or a previous study?             | 2     |
|                   | Data collection                                                         | Were data collected directly from the participants or is a proxy was used, was it appropriate?                                                             | 1     |
|                   |                                                                         | Was the same mode of data collection used for all participants for the condition of interest?                                                              | 1     |
|                   | Uncertainty of estimation                                               | Was the parameter of interest reported with uncertainty, i.e. Standard deviation (SD), Standard Error (SE) or 95% Confidence Interval (CI)?                | 1     |
|                   | Appropriateness of time factor for outcome measure                      | Was the length of recall period for the parameter of interest appropriate to ascertain outcome/exposure?                                                   | 2     |
|                   | Appropriateness of numerator and denominator in calculation of estimate | Were the numerator and the denominator for the parameter of interest appropriate? If not, can these be extracted to recalculate the parameter of interest? | 2     |
|                   | Confounding                                                             | Were potential confounding factors sought and controlled for?                                                                                              | 1     |
| Total Score       |                                                                         |                                                                                                                                                            | 20    |

Risk of bias was assessed using a web-based standardised checklist for systematic review of observational epidemiological studies, Burden of Disease Review Manager (BODRevMan) developed by the South African Medical Research Council [31], that was adapted from the risk of bias tool for population-based studies [36] and the Newcastle-Ottawa Scale for assessing the quality of non-randomised studies [37,38].

**Table S4. Prevalence of T2DM in South Africans aged 25 years and older.**

| Author                        | Province | Sample size | Year       | Population group         | Age (years) | T2DM Prevalence     |                     |                     |                     |                    |                   |                     |                    |                     | Test         | Diagnostic criteria | Risk of bias |
|-------------------------------|----------|-------------|------------|--------------------------|-------------|---------------------|---------------------|---------------------|---------------------|--------------------|-------------------|---------------------|--------------------|---------------------|--------------|---------------------|--------------|
|                               |          |             |            |                          |             | Urban               |                     |                     | Rural               |                    |                   | Urban and Rural     |                    |                     |              |                     |              |
|                               |          |             |            |                          |             | Female              | Male                | Total               | Female              | Male               | Total             | Female              | Male               | Total               |              |                     |              |
| Charlton et al 2001 [44]      | WC       | 152         | 1997       | Coloured                 | ≥ 55        |                     |                     |                     | 28.9<br>(19.5-38.2) | 15.8<br>(4.2-27.4) | 24.6<br>(17.2-32) |                     |                    |                     | OGTT         | WHO, 1985           | Moderate     |
| Alberts et al 2005 [45]       | Limpopo  | 1391        | NR         | Black African            | ≥ 30        |                     |                     |                     | 10.0<br>(8.3-12.0)  | 9.9<br>(6.7-13.8)  | 9.9<br>(8.4-11.6) |                     |                    |                     | FPG          | WHO, 1998           | Moderate     |
| Motala et al 2008 [26]        | KZN      | 1025        | 1999-2000  | Black African            | ≥ 25        |                     |                     |                     | 5.4<br>(3.8-7.3)    | 5.8<br>(2.7-6.6)   | 5.4<br>(4.0-7.2)  |                     |                    |                     | FPG/<br>OGTT | WHO,1998            | Low          |
| Prakaschandra et al 2016 [42] | KZN      | 1428        | 2007-2008  | Indian                   | 25-64       |                     |                     | 35.2<br>(32.6-37.9) |                     |                    |                   |                     |                    |                     | FPG          | WHO, 2006           | Low          |
| van Zyl et al 2012 [47]       | FS       | 955         | 2007-2009  | Black African & Coloured | 25-64       | 5.1<br>(2.9-8.1)    | 2.1<br>(0.3-7.3)    | 4.3<br>(2.6-6.8)    | 9.1<br>(6.4-12.4)   | 5.0<br>(2.2-9.6)   | 7.9<br>(5.8-10.5) |                     |                    |                     | FPG          | WHO, 1998           | Low          |
| Peer et al 2012 [16]          | WC       | 1099        | 2008-2009  | Black African            | 25-74       | 13.8<br>(11.4-16.3) | 10.2<br>(7.1-13.4)  | 12.1<br>(10.2-14.0) |                     |                    |                   |                     |                    |                     | FPG/<br>OGTT | WHO, 1998           | Low          |
| Erasmus et al 2012 [17]       | WC       | 642         | 2008-2009  | Coloured                 | ≥ 30        |                     |                     | 28.2<br>(24.6-32.2) |                     |                    |                   |                     |                    |                     | FPG/<br>OGTT | WHO, 2008           | Low          |
| SANHANES 2014 [21]            | National | 1063        | 2012       | All                      | ≥ 25        |                     |                     |                     |                     |                    |                   | 17.7<br>(13.5-22.8) | 11.3<br>(7.3-17.0) | 14.7<br>(11.8-18.3) | HbA1c        | WHO,2011            | Moderate     |
| Hird et al 2016 [46]          | KZN      | 1190        | 2013- 2014 | Black African            | ≥ 25        | 19.1<br>(16.1-22.3) | 9.4<br>(6.1-13.8)   | 16.5<br>(14.1-19.0) |                     |                    |                   |                     |                    |                     | FPG/<br>OGTT | WHO, 1998,<br>2011  | Low          |
| Zemlin et al 2019 [43]        | WC       | 1518        | 2014-2016  | Coloured                 | ≥ 30        | 20.9<br>(18.6-23.4) | 13.9<br>(10.6-17.8) | 19.1<br>(17.2-21.2) |                     |                    |                   |                     |                    |                     | FPG/<br>OGTT | WHO, 2006           | Moderate     |
| SADHS 2019 [21]               | National | 4919        | 2016       | All                      | ≥ 25        |                     |                     |                     |                     |                    |                   | 17.3<br>(15.7-19.1) | 11.6<br>(9.9-13.6) | 14.9<br>(13.6-16.3) | HbA1c        | WHO, 2011           | Moderate     |

NR, not reported. EC, Eastern Cape; KZN, KwaZulu Natal; WC, Western Cape.



**Table S5.** Prevalence of IGT, IFG and undiagnosed T2DM in South Africans aged 25 years and older.

| Author                        | Province | Sample size | Year       | Population group | Age (years) | IGT Prevalence      |                    | IFG Prevalence      |                  | Undiagnosed T2DM    |                  | Test         | Diagnostic criteria |
|-------------------------------|----------|-------------|------------|------------------|-------------|---------------------|--------------------|---------------------|------------------|---------------------|------------------|--------------|---------------------|
|                               |          |             |            |                  |             | Urban               | Rural              | Urban               | Rural            | Urban               | Rural            |              |                     |
| Charlton et al 2001 [44]      | WC       | 152         | 1997       | Coloured         | ≥ 55        |                     | 11.5<br>(5.9-17.0) |                     |                  |                     |                  | OGTT         | WHO, 1985           |
| Motala et al 2008 [26]        | KZN      | 1025        | 1999-2000  | Black African    | ≥ 25        |                     | 7.5<br>(5.8-9.4)   |                     | 1.4<br>(0.7-2.5) |                     | 4.6<br>(3.3-6.3) | FPG/<br>OGTT | WHO,1998            |
| Prakaschandra et al 2016 [42] | KZN      | 1428        | 2007-2008  | Indian           | 25-64       | 15.6<br>(13.7-17.8) |                    | 31.4<br>(28.8-34.0) |                  |                     |                  | FPG          | WHO, 2006           |
| Peer et al 2012 [16]          | WC       | 1099        | 2008-2009  | Black African    | 25-74       | 10.7<br>(8.9-12.6)  |                    | 1.2<br>(0.6-1.9)    |                  | 4.9<br>(3.7-6.3)    |                  | FPG/<br>OGTT | WHO, 1998           |
| Erasmus et al 2012 [17]       | WC       | 642         | 2008-2009  | Coloured         | ≥ 30        | 15.3<br>(12.4-18.5) |                    | 4.4<br>(2.9-6.5)    |                  | 18.1<br>(15.0-21.6) |                  | FPG/<br>OGTT | WHO, 2008           |
| Hird et al 2016 [46]          | KZN      | 1190        | 2013- 2014 | Black African    | ≥ 25        | 4.3<br>(3.1-5.8)    |                    | 0.9<br>(0.4-1.7)    |                  |                     |                  | FPG/<br>OGTT | WHO, 1998,<br>2011  |
| Zemlin et al 2019 [43]        | WC       | 1518        | 2014-2016  | Coloured         | ≥ 30        |                     |                    |                     |                  | 6.3<br>(5.1-7.6)    |                  | FPG/<br>OGTT | WHO, 2006           |

EC, Eastern Cape; KZN, KwaZulu Natal; WC, Western Cape.

**Table S6. Level of evidence as qualified with GRADE**

| Certainty assessment |              |              |               |              |             |                      | No of patients | Prevalence estimates | Certainty |
|----------------------|--------------|--------------|---------------|--------------|-------------|----------------------|----------------|----------------------|-----------|
| No of studies        | Study design | Risk of bias | Inconsistency | Indirectness | Imprecision | Other considerations | T2DM           | (%)                  |           |

Prevalence of Type 2 Diabetes (assessed with: The following criteria was used to diagnosed type 2 diabetes: 1. WHO (2006) diagnostic criteria where type 2 diabetes is diagnosed either by a physician, fasting blood glucose concentrations  $\geq 7.0$  mmol/L, 2-hour oral glucose tolerance test values  $\geq 11.1$  mmol/L or self-reported use of oral diabetes drugs. 2. Glycated haemoglobin  $\geq 6.5\%$  (48 mmol/mol))

|    |                       |                      |                      |                      |         |      |        |                     |                                 |
|----|-----------------------|----------------------|----------------------|----------------------|---------|------|--------|---------------------|---------------------------------|
| 11 | observational studies | serious <sup>a</sup> | serious <sup>b</sup> | serious <sup>c</sup> | serious | none | 14,685 | 15.25 (11.07-19.95) | ⊕○○○ <sup>abc</sup><br>VERY LOW |
|----|-----------------------|----------------------|----------------------|----------------------|---------|------|--------|---------------------|---------------------------------|

Impaired glucose tolerance (IGT) (assessed with: IGT measured using FPG  $< 7.0$  mmol/L and 2-hour OGTT plasma  $\geq 7.8$  mmol/L and  $< 11.1$  mmol/L)

|   |                       |                      |                      |             |                      |      |       |                   |                                |
|---|-----------------------|----------------------|----------------------|-------------|----------------------|------|-------|-------------------|--------------------------------|
| 5 | observational studies | serious <sup>a</sup> | serious <sup>b</sup> | not serious | serious <sup>a</sup> | none | 3,592 | 9.59 (5.82-14.17) | ⊕○○○ <sup>ab</sup><br>VERY LOW |
|---|-----------------------|----------------------|----------------------|-------------|----------------------|------|-------|-------------------|--------------------------------|

Undiagnosed Type 2 Diabetes (assessed with: • T2DM defined as fasting plasma glucose (FPG)  $\geq 7.0$  mmol/L, 2-hour oral glucose tolerance test (OGTT) plasma glucose  $\geq 11.1$  mmol/L, glycated haemoglobin (HbA1c)  $\geq 6.5\%$  (48 mmol/mol))

|   |                       |                      |                      |             |                      |      |       |                   |                                |
|---|-----------------------|----------------------|----------------------|-------------|----------------------|------|-------|-------------------|--------------------------------|
| 7 | observational studies | serious <sup>a</sup> | serious <sup>b</sup> | not serious | serious <sup>a</sup> | none | 4,205 | 8.29 (4.97-12.34) | ⊕○○○ <sup>ab</sup><br>VERY LOW |
|---|-----------------------|----------------------|----------------------|-------------|----------------------|------|-------|-------------------|--------------------------------|

Impaired fasting glucose (assessed with: Assessed using  $> 6.1$  mmol/L and  $< 7.0$  mmol/L)

|   |                       |                      |                      |             |                      |      |       |                  |                                |
|---|-----------------------|----------------------|----------------------|-------------|----------------------|------|-------|------------------|--------------------------------|
| 5 | observational studies | serious <sup>a</sup> | serious <sup>b</sup> | not serious | serious <sup>b</sup> | none | 4,710 | 3.55 (0.38-9.61) | ⊕○○○ <sup>ab</sup><br>VERY LOW |
|---|-----------------------|----------------------|----------------------|-------------|----------------------|------|-------|------------------|--------------------------------|

CI: Confidence interval

### Explanations

a. Downgraded by 1 because of limitations in studies design, poor response rate and unclear of risk of bias.

b. Downgraded by 1 because of methodological limitations

c. More studies reporting on female population creating gender bias which negatively affects generalizability

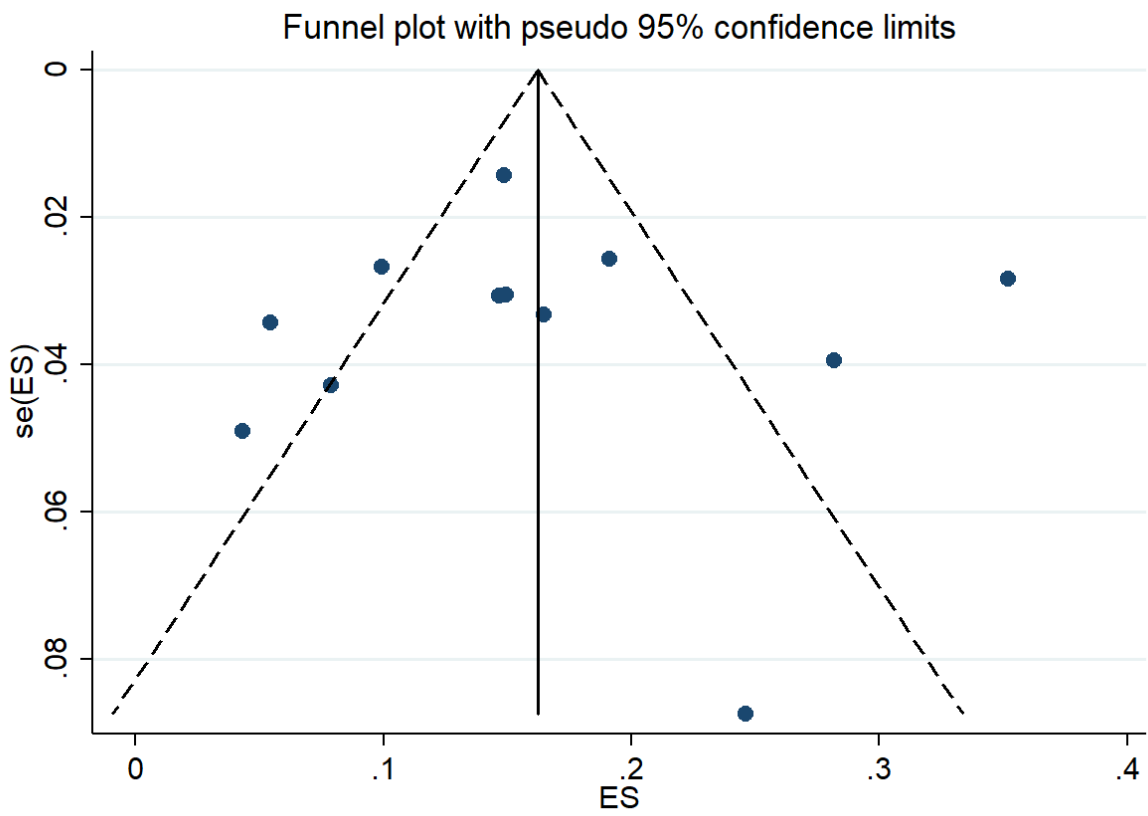

**Figure S1.** Funnel plot of included studies.
